# Supplementary material
Source: PubMed Central journal article supplement (PMC4394359)
Supplement: NIHMS62213-supplement-2.pdf [file NIHMS62213-supplement-2.pdf]

## Supplementary Tables

**Supplementary Table 1. Activation peaks of the analysis correlating univariate brain activity with the slopes of multivariate competitor suppression and target enhancement.** The table presents MNI xyz coordinates, t-values and the extent (size) k of each cluster showing a significant correlation.

|                                                | xyz        | t-value | k   |
|------------------------------------------------|------------|---------|-----|
| <b>Correlation with competitor suppression</b> |            |         |     |
| inferior frontal gyrus (BA 11)                 | -39 32 -9  | 5.82    | 129 |
| middle frontal gyrus (BA 46)                   | -42 32 21  | 5.70    | 45  |
| inferior parietal lobe (BA 39)                 | 42 -67 40  | 5.66    | 20  |
| inferior frontal gyrus (BA 11)                 | 45 17 10   | 5.66    | 85  |
| postcentral gyrus (BA 2)                       | -48 -25 32 | 4.75    | 15  |
| fusiform gyrus (BA 37)                         | 36 -40 -12 | 4.74    | 16  |
| parahippocampal gyrus (BA 30)                  | -15 -49 -5 | 4.70    | 31  |
| parahippocampal gyrus (BA 19/36)               | 18 -43 -9  | 4.67    | 12  |
| middle frontal gyrus (BA 46)                   | -45 44 6   | 4.19    | 10  |
| precentral gyrus (BA 6)                        | -36 -1 36  | 4.05    | 12  |
| <b>Correlation with target enhancement</b>     |            |         |     |
| middle frontal gyrus (BA 46)                   | -45 26 32  | 4.05    | 16  |

**Supplementary Table 2. Results from a number of control analyses on the item-specific templates.** The table presents t-values, p-values and the corresponding Bayes factors (Jeffrey-Zellner-Siow Prior) for the comparison between competitor templates and their corresponding baseline templates. Both regions of interest showed no evidence for a difference in signal-to-noise ratio, informational density as measured with Shannon’s entropy, or in the average correlation between templates (see Online Methods). The corresponding Bayes factors are in the range of 3.5 – 6.5, which can be interpreted as strong evidence in favour of the null hypothesis that there is no difference between the templates.

|                              | Signal-to-noise ratio |            | Shannon entropy |            | Average correlation |            |
|------------------------------|-----------------------|------------|-----------------|------------|---------------------|------------|
|                              | Target                | Competitor | Target          | Competitor | Target              | Competitor |
| <b>Ventral visual cortex</b> |                       |            |                 |            |                     |            |
| <i>t</i> (23)                | 0.28                  | 0.44       | 0.15            | 0.52       | 0.76                | 0.13       |
| <i>p</i> -value              | 0.78                  | 0.67       | 0.85            | 0.59       | 0.48                | 0.87       |
| Bayes factor                 | 6.14                  | 5.82       | 6.31            | 5.61       | 4.83                | 6.32       |
| <b>Hippocampus</b>           |                       |            |                 |            |                     |            |
| <i>t</i> (23)                | 0.33                  | 0.53       | 0.87            | 0.62       | 1.08                | 0.57       |
| <i>p</i> -value              | 0.77                  | 0.54       | 0.67            | 0.64       | 0.17                | 0.72       |
| Bayes factor                 | 6.05                  | 5.57       | 4.44            | 5.30       | 3.67                | 5.45       |
